# Supplementary material for: Controlled synthesis, structures and properties of one-, two-, and three-dimensional lanthanide coordination polymers based on (8-quinolyloxy)acetate
Source: Royal Society of Chemistry journal article supplement (doi:10.1039/b910219a), 2009-09-04
Supplement: b910219a.pdf [file b910219a.pdf]

## **Electronic Supplementary Information (ESI)**

### **Controlled synthesis, structures and properties of one-, two-, and three-dimensional lanthanide coordination polymers based on (8-quinolyloxy)acetate**

Jun Fan, Zhi-hong Wang, Ming Yang, Xia Yin, Wei-guang Zhang\*, Zhuo-fen Huang, Rong-hua Zeng

*School of Chemistry and Environment, South China Normal University, Guangzhou, 510006, P. R. China*

\* Corresponding author.

E-mail: [wgzhang@scnu.edu.cn](mailto:wgzhang@scnu.edu.cn) (W.G. Zhang).

Tel./Fax.: 86-20-39347768

## Contents

**Fig. S1** A 3D supramolecular network constructed by  $\pi\cdots\pi$  stacking attractions in **1**.

**Fig. S2** A 3D supramolecular network constructed by  $\pi\cdots\pi$  stacking attractions in **3**.

**Fig. S3** A 3D supramolecular network constructed by  $\pi\cdots\pi$  stacking attractions in **5**.

**Fig. S4** Schematic representation of 8-connected 3D framework in **7**.

**Fig. S5** TGA curves for compounds **1**, **3** and **5**.

**Fig. S6** The H-bonding schemes in compounds **1** and **2**.

**Fig. S7** The H-bonding patterns in compounds **3** and **4**.

**Table S1.** Distances (Å) and angles (°) of hydrogen bonds for compounds **1** - **5**.

**Table S2.** Selected bond angles (°) of compounds **1** - **7**.

**Fig. S1** A 3D supramolecular network constructed by  $\pi\cdots\pi$  stacking

attractions in **1**.

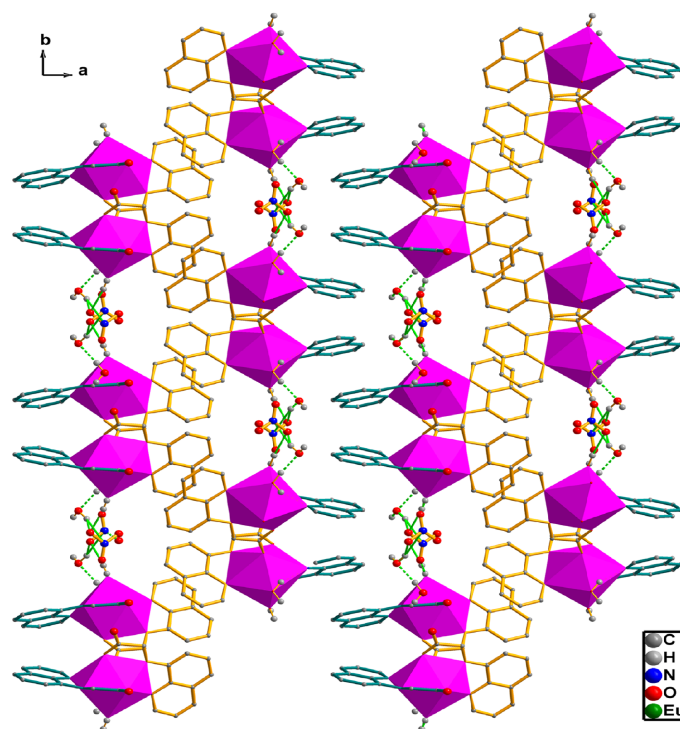

**Fig. S2** A 3D supramolecular network constructed by  $\pi\cdots\pi$  stacking attractions in **3**.

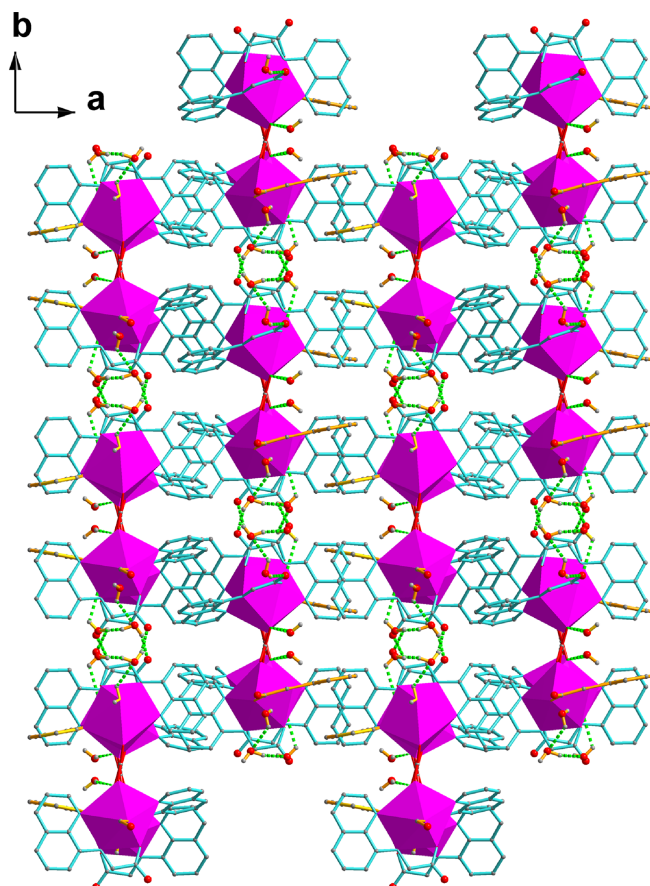



**Fig. S3** A 3D supramolecular network constructed by  $\pi\cdots\pi$  stacking attractions in **5**.

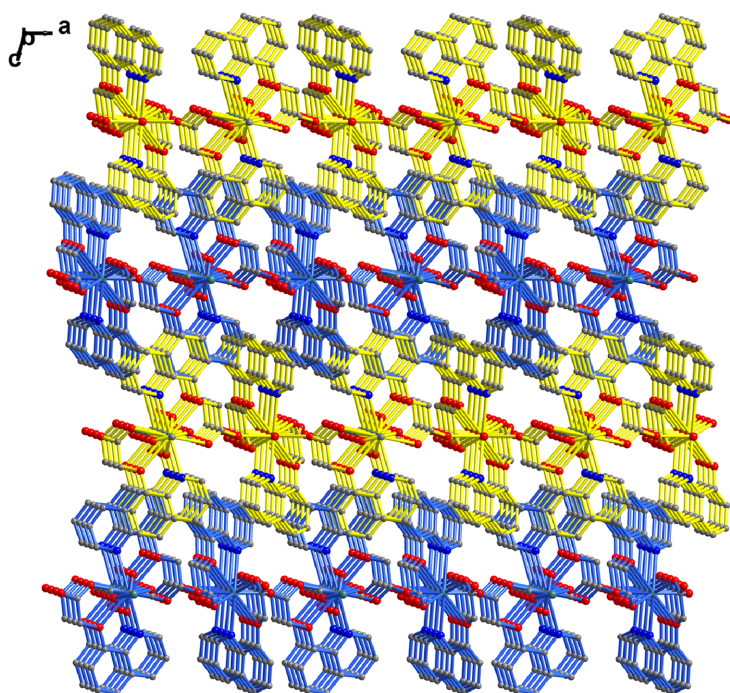

**Fig. S4** Schematic representation of 8-connected 3D framework in 7.

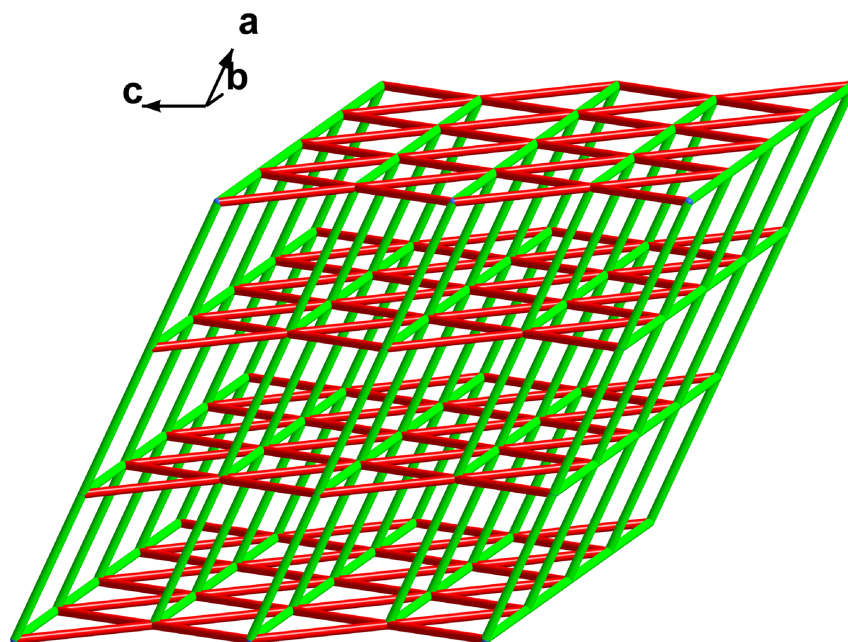

**Fig. S5 TGA curves for compounds 1, 3 and 5.**

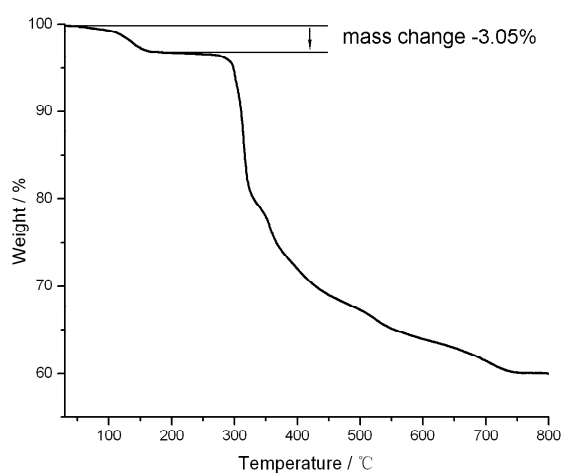

**(1)**

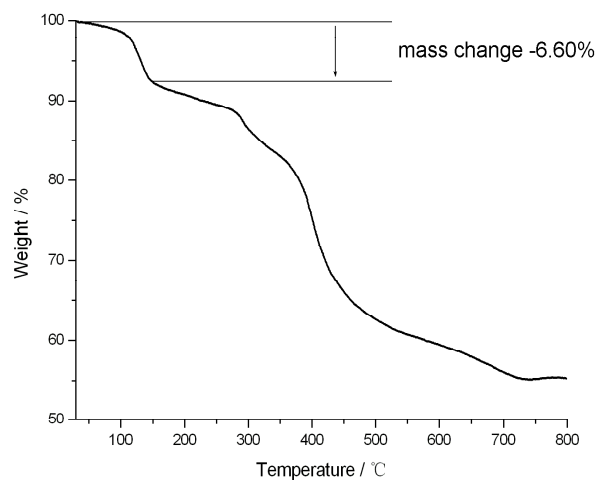

**(3)**

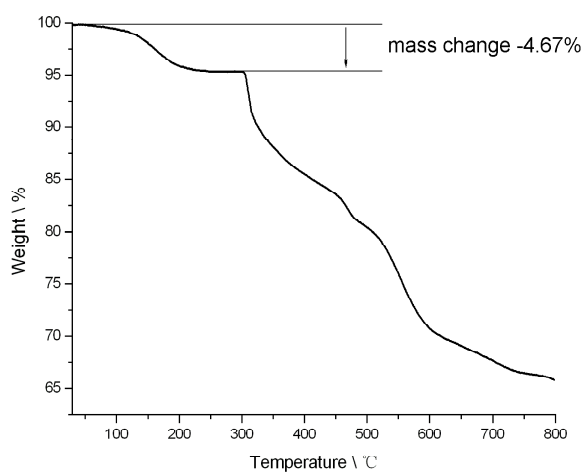

**(5)**

**Fig. S6** The H-bonding schemes in compounds **1(a)** and **2(b)**.

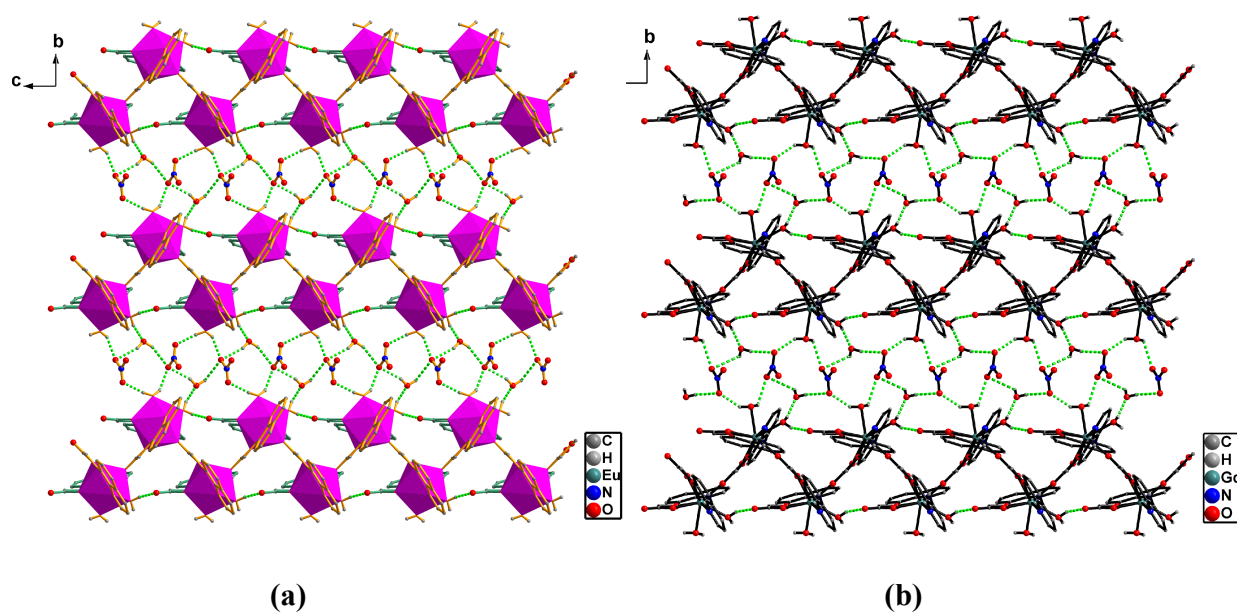

**Fig. S7** The H-bonding patterns in compounds **3(a)** and **4(b)**.

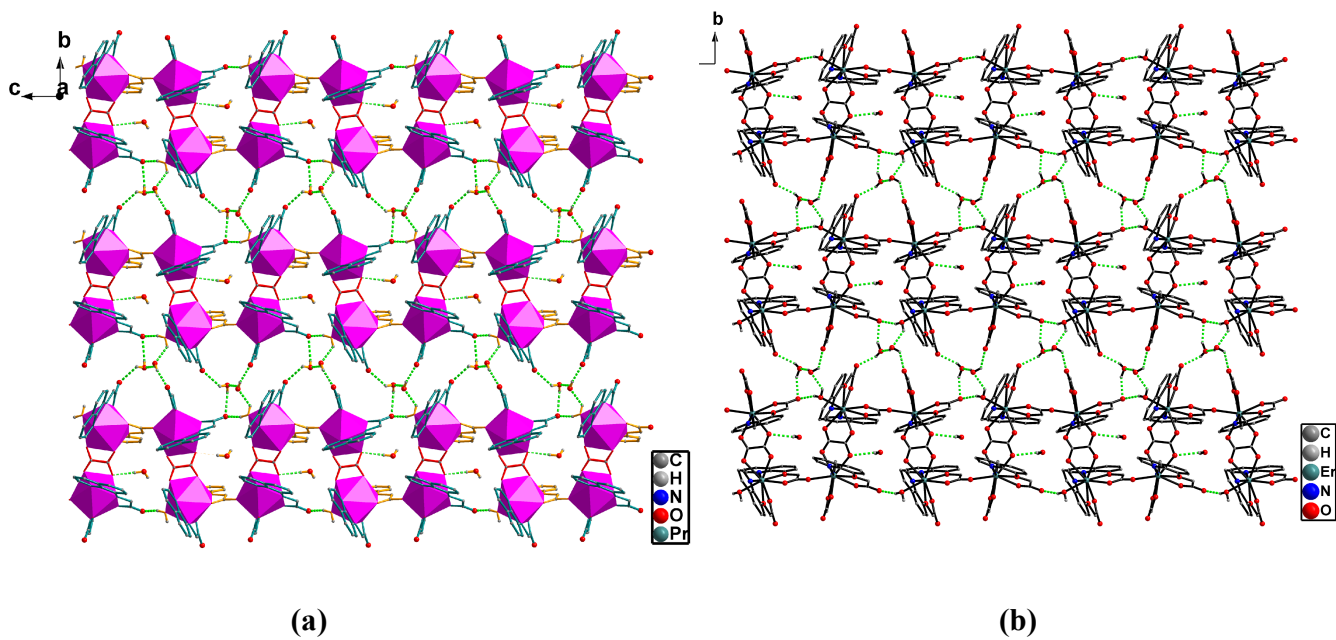

**Table S1.** Distances (Å) and angles (°) of hydrogen bonds for compounds **1 - 5**.

|          | D-H...A             | d (D-H) | d (H...A) | d (D...A) | ∠ (DHA) | Symmetry<br>equivalent operators |
|----------|---------------------|---------|-----------|-----------|---------|----------------------------------|
| <b>1</b> | O(1w)-H(1w)...O(9)  | 0.86    | 2.04      | 2.800(12) | 146.0   |                                  |
|          | O(1w)-H(2w)...O(9)  | 0.85    | 2.40      | 3.042(13) | 132.3   | <i>x, -y+1/2, z+1/2</i>          |
|          | O(2w)-H(3w)...O(9)  | 0.84    | 2.08      | 2.806(10) | 145.0   | <i>x, -y+1/2, z+1/2</i>          |
|          | O(2w)-H(4w)...O(8)  | 0.84    | 1.92      | 2.748(8)  | 170.9   |                                  |
|          | O(3w)-H(5w)...O(6)  | 0.85    | 1.89      | 2.701(6)  | 159.2   | <i>x, y, z+1</i>                 |
|          | O(3w)-H(6w)...O(1w) | 0.85    | 1.88      | 2.716(8)  | 167.5   | <i>x, -y+1/2, z+1/2</i>          |
| <b>2</b> | O(1w)-H(2w)...O(7)  | 0.86    | 2.21      | 3.055(13) | 168.1   |                                  |
|          | O(1w)-H(2w)...O(9)  | 0.86    | 2.41      | 3.085(15) | 136.4   | <i>x, -y+3/2, z-1/2</i>          |
|          | O(2w)-H(3w)...O(9)  | 0.85    | 2.33      | 2.809(12) | 116.3   | <i>x, -1+y, z</i>                |
|          | O(2w)-H(4w)...O(7)  | 0.92    | 1.95      | 2.741(11) | 143.0   | <i>x, 1/2-y, 1/2+z</i>           |
|          | O(3w)-H(5w)...O(6)  | 0.85    | 1.92      | 2.721(8)  | 156.0   | <i>x, y, -1+z</i>                |
|          | O(3w)-H(6w)...O(1w) | 0.85    | 1.93      | 2.693(10) | 149.0   | <i>x, 1/2-y, -1/2+z</i>          |
| <b>3</b> | O(1w)-H(1w)...O(9)  | 0.85    | 1.88      | 2.711(8)  | 163.7   | <i>x, y, 1+z</i>                 |
|          | O(1w)-H(2w)...O(2w) | 0.85    | 2.14      | 2.667(9)  | 119.7   | <i>x, y, 1+z</i>                 |
|          | O(2w)-H(3w)...O(3w) | 0.83    | 2.04      | 2.762(11) | 144.8   |                                  |
|          | O(2w)-H(4w)...O(12) | 0.82    | 1.94      | 2.718(10) | 157.0   | <i>x, 1/2-y, -1/2+z</i>          |
|          | O(3w)-H(5w)...O(9)  | 0.82    | 2.39      | 2.881(10) | 118.8   |                                  |
|          | O(4w)-H(7w)...O(16) | 0.85    | 2.21      | 2.993(10) | 152.4   | <i>x, 3/2-y, -1/2+z</i>          |
|          | O(3w)-H(6w)...O(6)  | 0.82    | 2.42      | 2.739(10) | 104.0   | <i>x, 1/2-y, -1/2+z</i>          |
| <b>4</b> | O(1w)-H(1w)...O(3w) | 0.85    | 2.01      | 2.673(10) | 134.3   | <i>x, 1/2-y, 1/2+z</i>           |
|          | O(1w)-H(2w)...O(9)  | 0.85    | 1.93      | 2.732(10) | 157.5   | <i>x, y, 1+z</i>                 |
|          | O(2w)-H(3w)...O(6)  | 0.85    | 2.07      | 2.754(13) | 136.9   |                                  |
|          | O(2w)-H(4w)...O(9)  | 0.85    | 2.07      | 2.868(12) | 156.1   | <i>x, 1/2-y, 1/2+z</i>           |
|          | O(3w)-H(5w)...O(2w) | 0.85    | 1.93      | 2.761(13) | 164.5   |                                  |

|          |                     |      |      |           |       |           |
|----------|---------------------|------|------|-----------|-------|-----------|
|          | O(3w)-H(6w)...O(12) | 0.85 | 2.07 | 2.718(13) | 132.8 |           |
|          | O(4w)-H(8w)...O(14) | 0.85 | 2.31 | 2.988(15) | 136.3 |           |
| <b>5</b> | O(1w)-H(1w)...O(2w) | 0.85 | 2.21 | 2.987(5)  | 152.1 |           |
|          | O(2w)-H(4w)...O(3)  | 0.85 | 1.98 | 2.823(5)  | 171.5 | x, y-1, z |
|          | O(2w)-H(3w)...O(7)  | 0.85 | 2.27 | 3.046(5)  | 152.5 |           |
|          | O(3w)-H(5w)...O(3)  | 0.85 | 1.99 | 2.832(7)  | 175.4 | x, y-1, z |

**Table S2.** Selected bond angles ( ° ) of compounds **1 - 7**.

| <b>1</b>                        |            |                                |            |
|---------------------------------|------------|--------------------------------|------------|
| O(3) <sup>#1</sup> -Eu(1)-O(5)  | 142.23(15) | O(2w)-Eu(1)-N(1)               | 84.00(16)  |
| O(3) <sup>#1</sup> -Eu(1)-O(2)  | 78.40(14)  | O(3w)-Eu(1)-N(1)               | 75.03(14)  |
| O(5)-Eu(1)-O(2)                 | 79.96(14)  | N(2)-Eu(1)-N(1)                | 149.91(14) |
| O(3) <sup>#1</sup> -Eu(1)-O(2w) | 139.07(15) | O(3) <sup>#1</sup> -Eu(1)-O(1) | 73.48(14)  |
| O(5)-Eu(1)-O(2w)                | 73.65(15)  | O(5)-Eu(1)-O(1)                | 69.16(13)  |
| O(2)-Eu(1)-O(2w)                | 139.64(15) | O(2)-Eu(1)-O(1)                | 62.87(12)  |
| O(3) <sup>#1</sup> -Eu(1)-O(3w) | 69.73(15)  | O(2w)-Eu(1)-O(1)               | 130.18(14) |
| O(5)-Eu(1)-O(3w)                | 139.29(14) | O(3w)-Eu(1)-O(1)               | 125.31(13) |
| O(2)-Eu(1)-O(3w)                | 140.53(14) | N(2)-Eu(1)-O(1)                | 133.87(13) |
| O(2w)-Eu(1)-O(3w)               | 69.51(14)  | N(1)-Eu(1)-O(1)                | 60.92(13)  |
| O(3) <sup>#1</sup> -Eu(1)-N(2)  | 79.61(15)  | O(3) <sup>#1</sup> -Eu(1)-O(4) | 133.28(14) |
| O(5)-Eu(1)-N(2)                 | 123.86(14) | O(5)-Eu(1)-O(4)                | 62.89(13)  |
| O(2)-Eu(1)-N(2)                 | 75.58(14)  | O(2)-Eu(1)-O(4)                | 68.45(13)  |
| O(2w)-Eu(1)-N(2)                | 94.36(16)  | O(2w)-Eu(1)-O(4)               | 72.46(15)  |
| O(3w)-Eu(1)-N(2)                | 76.29(15)  | O(3w)-Eu(1)-O(4)               | 119.15(13) |
| O(3) <sup>#1</sup> -Eu(1)-N(1)  | 82.12(15)  | N(2)-Eu(1)-O(4)                | 61.23(13)  |
| O(5)-Eu(1)-N(1)                 | 84.61(15)  | N(1)-Eu(1)-O(4)                | 143.84(13) |
| O(2)-Eu(1)-N(1)                 | 123.61(14) | O(1)-Eu(1)-O(4)                | 115.54(11) |
| <b>2</b>                        |            |                                |            |
| O(3) <sup>#1</sup> -Gd(1)-O(5)  | 142.3(2)   | O(2w)-Gd(1)-N(2)               | 94.3(2)    |
| O(3) <sup>#1</sup> -Gd(1)-O(2)  | 78.2(2)    | O(3w)-Gd(1)-N(2)               | 75.6(2)    |
| O(5)-Gd(1)-O(2)                 | 80.2(2)    | N(1)-Gd(1)-N(2)                | 149.7(2)   |
| O(3) <sup>#1</sup> -Gd(1)-O(2w) | 139.2(2)   | O(3) <sup>#1</sup> -Gd(1)-O(1) | 73.35(19)  |
| O(5)-Gd(1)-O(2w)                | 73.6(2)    | O(5)-Gd(1)-O(1)                | 69.31(19)  |
| O(2)-Gd(1)-O(2w)                | 139.59(19) | O(2)-Gd(1)-O(1)                | 62.98(18)  |

|                                  |            |                                                |            |
|----------------------------------|------------|------------------------------------------------|------------|
| O(3) <sup>#1</sup> - Gd(1)-O(3w) | 70.0(2)    | O(2w)- Gd(1)-O(1)                              | 130.43(19) |
| O(5)- Gd(1)-O(3w)                | 139.2(2)   | O(3w)-Gd(1)- O(1)                              | 125.62(18) |
| O(2)- Gd(1)-O(3w)                | 140.25(19) | N(1)- Gd(1)- O(1)                              | 61.20(19)  |
| O(2w)-Gd(1)-O(3w)                | 69.39(19)  | N(2)- Gd(1)- O(1)                              | 133.78(19) |
| O(3) <sup>#1</sup> - Gd(1)- N(1) | 82.9(2)    | O(3) <sup>#1</sup> - Gd(1)- O(4)               | 132.92(19) |
| O(5)- Gd(1)- N(1)                | 84.1(2)    | O(5)- Gd(1)- O(4)                              | 63.10(18)  |
| O(2)- Gd(1)- N(1)                | 124.0(2)   | O(2)- Gd(1)- O(4)                              | 68.29(18)  |
| O(2w)- Gd(1)- N(1)               | 83.6(2)    | O(2w)-Gd(1)- O(4)                              | 72.51(18)  |
| O(3w)- Gd(1)- N(1)               | 75.5(2)    | O(3w)- Gd(1)- O(4)                             | 118.83(18) |
| O(3) <sup>#1</sup> - Gd(1)- N(2) | 79.1(2)    | N(1)- Gd(1)- O(4)                              | 143.47(19) |
| O(5)- Gd(1)- N(2)                | 124.4(2)   | N(2)- Gd(1)- O(4)                              | 61.5(2)    |
| O(2)- Gd(1)- N(2)                | 75.6(2)    | O(1)- Gd(1)- O(4)                              | 115.59(16) |
| <b>3</b>                         |            |                                                |            |
| O(5)- Pr(1)-O(1W)                | 78.7(2)    | O(11)- Pr(2)- O(8)                             | 85.5(2)    |
| O(5)- Pr(1)-O(2)                 | 81.6(2)    | O(11)- Pr(2)- O(3)                             | 76.2(2)    |
| O(1w)- Pr(1)-O(2)                | 143.7(2)   | O(8)- Pr(2)- O(3)                              | 144.5(2)   |
| O(5)- Pr(1)- O(14)               | 138.6(2)   | O(11)-Pr(2)- O(16) <sup>#1</sup>               | 139.3(2)   |
| O(1w)- Pr(1)- O(14)              | 138.7(2)   | O(8)- Pr(2)- O(16) <sup>#1</sup>               | 75.5(2)    |
| O(2)- Pr(1)- O(14)               | 72.9 (2)   | O(3)- Pr(2)- O(16) <sup>#1</sup>               | 136.4(2)   |
| O(5)- Pr(1)- O(13)               | 142.4(2)   | O(11)-Pr(2)- O(15) <sup>#1</sup>               | 140.9(2)   |
| O(1w)- Pr(1)- O(13)              | 74.5(2)    | O(8)- Pr(2)- O(15) <sup>#1</sup>               | 133.24(19) |
| O(2)- Pr(1)- O(13)               | 134.4(2)   | O(3)- Pr(2)- O(15) <sup>#1</sup>               | 72.43(19)  |
| O(14)- Pr(1)- O(13)              | 64.37(19)  | O(16) <sup>#1</sup> -Pr(2)-O(15) <sup>#1</sup> | 64.19(19)  |
| O(5)- Pr(1)- O(4)                | 62.20(19)  | O(11)- Pr(2)- O(10)                            | 62.96(18)  |
| O(1w)- Pr(1)- O(4)               | 75.65(19)  | O(8)- Pr(2)- O(10)                             | 72.66(19)  |
| O(2)- Pr(1)- O(4)                | 68.21(18)  | O(3)- Pr(2)- O(10)                             | 71.91(19)  |
| O(14)- Pr(1 )-O(4)               | 131.0(2)   | O(16) <sup>#1</sup> -Pr(2)-O(10)               | 138.7(2)   |
| O(13)- Pr(1)- O(4)               | 132.67(18) | O(15) <sup>#1</sup> (-Pr(2)-O(10)              | 125.44(18) |
| O(5)- Pr(1)- O(1)                | 71.7(2)    | O(11)- Pr(2)- N(3)                             | 78.0(2)    |
| O(1w)- Pr(1)- O(1)               | 136.16(19) | O(8)- Pr(2)- N(3)                              | 121.9(2)   |
| O(2)- Pr(1)- O(1)                | 62.26(17)  | O(3)- Pr(2)- N(3)                              | 84.1(2)    |
| O(14)- Pr(1)- O(1)               | 67.7(2)    | O(16) <sup>#1</sup> - Pr(2)- N(3)              | 82.0(2)    |
| O(13)- Pr(1)- O(1)               | 111.68(19) | O(15) <sup>#1</sup> - Pr(2)- N(3)              | 76.1(2)    |
| O(4)- Pr(1)- O(1)                | 115.34(17) | O(10)- Pr(2)- N(3)                             | 137.72(19) |
| O(5)- Pr(1)- N(1)                | 79.3(2)    | O(11)- Pr(2)- (7)                              | 73.5(2)    |
| O(1W)- Pr(1)- N(1)               | 83.4(2)    | O(8)- Pr(2)- O(7)                              | 62.32(18)  |
| O(2)- Pr(1)- N(1)                | 122.43(19) | O(3)- Pr(2)- O(7)                              | 136.40(19) |
| O(14)- Pr(1)- N(1)               | 87.4(2)    | O(16) <sup>#1</sup> - Pr(2)- O(7)              | 65.8(2)    |



|                     |            |                                               |            |
|---------------------|------------|-----------------------------------------------|------------|
| O(13)- Pr(1)- N(1)  | 71.8(2)    | O(15) <sup>#1</sup> - Pr(2)- O(7)             | 115.89(18) |
| O(4)- Pr(1) –N(1)   | 138.8(2)   | O(10)- Pr(2)-O(7)                             | 118.49(18) |
| O(1)- Pr(1)- N(1)   | 60.21(19)  | N(3)- Pr(2)- O(7)                             | 59.6(2)    |
| O(5)- Pr(1)- N(2)   | 121.5(2)   | O(11)- Pr(2)- N(4)                            | 123.4(2)   |
| O(1w)- Pr(1)- N(2)  | 77.7(2)    | O(8)- Pr(2)- N(4)                             | 76.0(2)    |
| O(2)- Pr(1)- N(2)   | 87.2 (2)   | O(3)- Pr(2)- N(4)                             | 88.91(19)  |
| O(14)- Pr(1)- N(2)  | 89.7(2)    | O(16) <sup>#1</sup> - Pr(2)- N(4)             | 86.8(2)    |
| O(13)- Pr(1)- N(2)  | 77.8(2)    | O(15) <sup>#1</sup> - Pr(2)- N(4)             | 79.0(2)    |
| O(4)- Pr(1)- N(2)   | 60.4(2)    | O(10)- Pr(2)- N(4)                            | 60.50(19)  |
| O(1)- Pr(1) –N(2)   | 145.79(19) | N(3)- Pr(2)- N(4)                             | 155.1(2)   |
| N(1)- Pr(1)- N(2)   | 147.5(2)   | O(7)- Pr(2)- N(4)                             | 134.13(19) |
| <b>4</b>            |            |                                               |            |
| O(5)- Er(1)-O(1w)   | 78.8(3)    | O(11)-Er(2)- O(8)                             | 85.4(2)    |
| O(5)- Er(1)- O(2)   | 81.7(2)    | O(11)- Er(2)- O(3)                            | 76.2(2)    |
| O(1w)- Er(1)- O(2)  | 143.4(2)   | O(8)- Er(2)- O(3)                             | 144.4(2)   |
| O(5)- Er(1)- O(16)  | 138.1(3)   | O(11)- Er(2)- O(14) <sup>#1</sup>             | 139.0(3)   |
| O(1w)- Er(1)- O(16) | 139.4(2)   | O(8)-Er(2)- O(14) <sup>#1</sup>               | 75.5(2)    |
| O(2) –Er(1)- O(16)  | 72.3(2)    | O(3)- Er(2)- O(13) <sup>#1</sup>              | 140.8(2)   |
| O(5)- Er(1)- O(15)  | 141.9(2)   | O(8)- Er(2)- O(13) <sup>#1</sup>              | 133.5(2)   |
| O(1w)- Er(1)- O(15) | 74.6(2)    | O(3)-Er(2)- O(13) <sup>#1</sup>               | 72.3(2)    |
| O(2)- Er(1)- O(15)  | 134.7(2)   | O(8)- Er(2)- O(13) <sup>#1</sup>              | 64.5(2)    |
| O(16)- Er(1)-O(15 ) | 65.1(2)    | O(14) <sup>#1</sup> Er(2)-O(13) <sup>#1</sup> | 63.3(2)    |
| O(5)- Er(1)- O(4)   | 62.7(2)    | O(8)- Er(2)- O(10)                            | 72.9(2)    |
| O(1w)- Er(1)-O(4)   | 75.2(2)    | O(3)-Er(2)- O(10)                             | 71.7(2)    |
| O(2)- Er(1)-O(4)    | 68.4(2)    | O(14) <sup>#1</sup> - Er(2)-O(10)             | 138.8(2)   |
| O(16)- Er(1)-O(4)   | 130.6(2)   | O(13) <sup>#1</sup> - Er(2)- O(10)            | 124.9(2)   |
| O(15)- Er(1)-O(4)   | 132.7(2)   | O(11)- Er(2)- N(3)                            | 78.1(2)    |
| O(5)- Er(1)- O(1)   | 71.2(2)    | O(8)- Er(2)- N(3)                             | 122.2(3)   |
| O(1w)- Er(1)- O(1)  | 136.4(2)   | O(3)- Er(2)- N(3)                             | 83.7(2)    |
| O(2)- Er(1)- O(1)   | 62.1(2)    | O(14) <sup>#1</sup> - Er(2)- N(3)             | 82.0(3)    |
| O(16)- Er(1)- O(1)  | 67.7(2)    | O(13) <sup>#1</sup> - Er(2)- N(3)             | 75.9(3)    |
| O(15)- Er(1)- O(1)  | 111.8(2)   | O(10)- Er(2)- N(3)                            | 137.8(2)   |
| O(4)- Er(1)- N(1)   | 78.6(3)    | O(11)- Er(2)- O(7)                            | 72.7(2)    |
| O(1w)- Er(1)-N(1)   | 82.8(2)    | O(8)- Er(2)- O(7)                             | 62.3(2)    |
| O(2)- Er(1)-N(1)    | 88.6(3)    | O(3)- Er(2)- O(7)                             | 135.9(2)   |
| O(16)- Er(1)-N(1)   | 71.5(2)    | O(14) <sup>#1</sup> - Er(2)- O(7)             | 66.3(2)    |
| O(15)- Er(1)-N(1)   | 138.2(2)   | O(13) <sup>#1</sup> - Er(2)- O(7)             | 116.7(2)   |
| O(16)- Er(1)-N(1)   | 61.0(2)    | O(10)- Er(2)- O(7)                            | 118.3(2)   |

|                    |          |                                   |          |
|--------------------|----------|-----------------------------------|----------|
| O(5)- Er(1)-N(2)   | 122.4(2) | N(7)- Er(2)- O(7)                 | 59.9(2)  |
| O(1w)- Er(1)- N(2) | 77.4(2)  | O(11)- Er(2)- N(4)                | 123.9(2) |
| O(2)- Er(1)- N(2)  | 87.6(2)  | O(8)- Er(2)- N(4)                 | 76.3(2)  |
| O(16)- Er(1)- N(2) | 89.3(3)  | O(3)- Er(2)- N(4)                 | 89.0(2)  |
| O(15)- Er(1)- N(2) | 77.6(2)  | O(14) <sup>#1</sup> - Er(2)- N(4) | 86.7(3)  |
| O(4)- Er(1)- N(2)  | 60.8(2)  | O(13) <sup>#1</sup> - Er(2)- N(4) | 78.5(3)  |
| O(1)- Er(1)- N(2)  | 145.9(2) | O(10)- Er(2)- N(4)                | 60.7(2)  |
| N(1)- Er(1)- N(2)  | 146.7(3) | N(3)- Er(2)- N(4)                 | 154.4(3) |
|                    |          | O(7)- Er(2)- N(4)                 | 134.5(2) |

5

|                                 |            |                                 |            |
|---------------------------------|------------|---------------------------------|------------|
| O(1)- Sm(1)- O(1w)              | 120.85(8)  | O(4) - Sm(2)-O(5)               | 61.16(12)  |
| O(1)-Sm(1)-O(2)                 | 62.48(12)  | O(4) - Sm(2)-O(7)               | 71.49(9)   |
| O(1)- Sm(1)- O(6)               | 73.84(12)  | O(4) - Sm(2)-N(2)               | 59.22(11)  |
| O(1)- Sm(1)-N(1)                | 61.04(11)  | O(4) - Sm(2)-O(8) <sup>#2</sup> | 64.30(10)  |
| O(1)-Sm(1)-O(1) <sup>#1</sup>   | 118.29(11) | O(4)-Sm(2)-O(4) <sup>#3</sup>   | 173.46(7)  |
| O(1)-Sm(1)-O(2) <sup>#1</sup>   | 69.38(12)  | O(4)-Sm(2)-O(5) <sup>#3</sup>   | 116.85(12) |
| O(1)-Sm(1)-O(6) <sup>#1</sup>   | 132.51(12) | O(4)-Sm(2)-O(7) <sup>#3</sup>   | 114.52(12) |
| O(1)- Sm(1)-N(1) <sup>#1</sup>  | 139.69(12) | O(4)-Sm(2)-N(2) <sup>#3</sup>   | 123.32(11) |
| O(1w)-Sm(1)-O(2)                | 142.54(9)  | O(4)-Sm(2)-O(8) <sup>#4</sup>   | 109.36(10) |
| O(1w)-Sm(1)-O(6)                | 67.21(9)   | O(5)-Sm(2)-O(7)                 | 81.02(10)  |
| O(1w)-Sm(1)-N(1)                | 74.25(8)   | O(5)-Sm(2)-N(2)                 | 119.82(12) |
| O(1w)-Sm(1)-O(1) <sup>#1</sup>  | 120.85(8)  | O(5)-Sm(2)-O(8) <sup>#2</sup>   | 76.76(10)  |
| O(1w)-Sm(1)-O(2) <sup>#1</sup>  | 142.54(9)  | O(5)-Sm(2)-O(4) <sup>#3</sup>   | 116.85(12) |
| O(1w)-Sm(1)-O(6) <sup>#1</sup>  | 67.21(9)   | O(5)-Sm(2)-O(5) <sup>#3</sup>   | 148.68(12) |
| O(1w)-Sm(1)-N(1) <sup>#1</sup>  | 74.25(8)   | O(5)-Sm(2)-O(7) <sup>#3</sup>   | 129.60(10) |
| O(2)-Sm(1)- O(6)                | 80.04(12)  | O(5)-Sm(2)-N(2) <sup>#3</sup>   | 71.36(12)  |
| O(2)-Sm(1)-N(1)                 | 123.44(12) | O(5)-Sm(2)-O(8) <sup>#4</sup>   | 75.28(12)  |
| O(2)-Sm(1)- O(1) <sup>#1</sup>  | 69.38(12)  | O(7)-Sm(2)-N(2)                 | 73.89(11)  |
| O(2)-Sm(1)- O(2) <sup>#1</sup>  | 74.91(12)  | O(7)-Sm(2)-O(8) <sup>#2</sup>   | 136.01(12) |
| O(2)-Sm(1)- O(6) <sup>#1</sup>  | 142.00(13) | O(7)-Sm(2)-O(4) <sup>#3</sup>   | 114.52(9)  |
| O(2)-Sm(1)- N(1) <sup>#1</sup>  | 83.10(12)  | O(7)-Sm(2)-O(5) <sup>#3</sup>   | 129.60(12) |
| O(6)-Sm(1)- N(1)                | 87.48(12)  | O(7)-Sm(2)-O(7) <sup>#3</sup>   | 53.88(9)   |
| O(6)-Sm(1)- O(1) <sup>#1</sup>  | 132.51(12) | O(7)-Sm(2)-N(2) <sup>#3</sup>   | 71.99(11)  |
| O(6)- Sm(1)- O(1) <sup>#1</sup> | 132.51(12) | O(7)-Sm(2)-O(8) <sup>#4</sup>   | 151.23(11) |
| O(6)- Sm(1)- O(2) <sup>#1</sup> | 142.00(13) | N(2)-Sm(2)-O(8) <sup>#2</sup>   | 85.01(11)  |
| O(6)- Sm(1)- O(6) <sup>#1</sup> | 134.41(12) | N(2)-Sm(2)-O(4) <sup>#3</sup>   | 123.32(11) |
| O(6)- Sm(1)- N(1) <sup>#1</sup> | 80.42(12)  | N(2)-Sm(2)-O(5) <sup>#3</sup>   | 71.36(12)  |
| N(1)- Sm(1)-O(1) <sup>#1</sup>  | 83.10(12)  | N(2)-Sm(2)-O(7) <sup>#3</sup>   | 71.99(12)  |

|                                               |            |                                              |            |
|-----------------------------------------------|------------|----------------------------------------------|------------|
| N(1)- Sm(1)-O(1) <sup>#1</sup>                | 139.69(11) | N(2)-Sm(2)-N(2) <sup>#3</sup>                | 141.58(10) |
| N(1)- Sm(1)-O(2) <sup>#1</sup>                | 83.10(12)  | N(2)-Sm(2)-O(8) <sup>#4</sup>                | 132.54(11) |
| N(1)- Sm(1)-O(6) <sup>#1</sup>                | 80.42(12)  | O(8) <sup>#2</sup> -Sm(2)-O(4) <sup>#3</sup> | 109.36(10) |
| N(1)- Sm(1)-N(1) <sup>#1</sup>                | 148.50(12) | O(8) <sup>#2</sup> -Sm(2)-O(5) <sup>#3</sup> | 75.28(12)  |
| O(1) <sup>#1</sup> - Sm(1)-O(2) <sup>#1</sup> | 62.48(12)  | O(8) <sup>#2</sup> -Sm(2)-O(7) <sup>#3</sup> | 151.23(11) |
| O(1) <sup>#1</sup> - Sm(1)-O(6) <sup>#1</sup> | 73.84(12)  | O(8) <sup>#2</sup> -Sm(2)-N(2) <sup>#3</sup> | 132.54(11) |
| O(1) <sup>#1</sup> - Sm(1)-N(1) <sup>#1</sup> | 61.04(11)  | O(8) <sup>#2</sup> -Sm(2)-O(8) <sup>#4</sup> | 52.96(11)  |
| O(2) <sup>#1</sup> - Sm(1)-O(6) <sup>#1</sup> | 80.04(12)  | O(4) <sup>#3</sup> -Sm(2)-O(5) <sup>#3</sup> | 61.16(12)  |
| O(2) <sup>#1</sup> - Sm(1)-N(1) <sup>#1</sup> | 123.44(12) | O(4) <sup>#3</sup> -Sm(2)-O(7) <sup>#3</sup> | 71.74(9)   |
| O(6) <sup>#1</sup> - Sm(1)-N(1) <sup>#1</sup> | 87.48(12)  | O(4) <sup>#3</sup> -Sm(2)-N(2) <sup>#3</sup> | 59.22(11)  |
| O(5) <sup>#3</sup> -Sm(2)-O(7) <sup>#3</sup>  | 81.02(10)  | O(4) <sup>#3</sup> -Sm(2)-O(8) <sup>#4</sup> | 64.30(10)  |
| O(5) <sup>#3</sup> -Sm(2)-N(2) <sup>#3</sup>  | 119.82(12) | O(5) <sup>#3</sup> -Sm(2)-O(8) <sup>#4</sup> | 76.76(11)  |
| O(7) <sup>#3</sup> -Sm(2)-N(2) <sup>#3</sup>  | 73.89(11)  | O(7) <sup>#3</sup> -Sm(2)-O(8) <sup>#4</sup> | 136.01(11) |
| N(2) <sup>#3</sup> -Sm(2)-O(8) <sup>#4</sup>  | 85.01(11)  |                                              |            |
| <b>6</b>                                      |            |                                              |            |
| O(5)- Sm(1)- O(7)                             | 76.68(8)   | O(4)- Sm(1)- O(2)                            | 131.72(7)  |
| O(5)- Sm(1)- O(6)                             | 80.84(8)   | O(5)- Sm(1)- O(1)                            | 139.23(7)  |
| O(7)- Sm(1)- O(6)                             | 118.97(8)  | O(7)- Sm(1)- O(1)                            | 143.97(7)  |
| O(5)- Sm(1)- O(3) <sup>#1</sup>               | 84.37(8)   | O(6)- Sm(1)- O(1)                            | 78.77(7)   |
| O(7)- Sm(1)- O(3) <sup>#1</sup>               | 76.31(8)   | O(3) <sup>#1</sup> - Sm(1)- O(1)             | 100.28(8)  |
| O(6)- Sm(1)- O(3) <sup>#1</sup>               | 155.13(8)  | O(4)- Sm(1)- O(1)                            | 84.20(7)   |
| O(5)- Sm(1)- O(4)                             | 121.61(8)  | O(2)- Sm(1)- O(1)                            | 61.14(7)   |
| O(7)- Sm(1)- O(4)                             | 73.99(8)   | O(5)- Sm(1)- N(1)                            | 155.81(8)  |
| O(6)- Sm(1)- O(4)                             | 71.41(8)   | O(7)- Sm(1)- N(1)                            | 83.71(8)   |
| O(3) <sup>#1</sup> - Sm(1)- O(4)              | 133.43(8)  | O(6)- Sm(1)- N(1)                            | 121.61(8)  |
| O(5)- Sm(1)- O(2)                             | 78.76(8)   | O(3) <sup>#1</sup> - Sm(1)- N(1)             | 77.27(8)   |
| O(7)- Sm(1)- O(2)                             | 151.87(8)  | O(4)- Sm(1)- N(1)                            | 64.60(8)   |
| O(6)- Sm(1)- O(2)                             | 69.73(8)   | O(2)- Sm(1)- N(1)                            | 115.68(8)  |
| O(3) <sup>#1</sup> - Sm(1)- O(2)              | 87.88(8)   | O(1)- Sm(1)- N(1)                            | 60.89(7)   |
| <b>7</b>                                      |            |                                              |            |
| O(6)- Eu(1)- O(5)                             | 76.55(10)  | O(3) <sup>#1</sup> - Eu(1)-O(1)              | 99.89(10)  |
| O(6)- Eu(1)- O(4)                             | 80.82(10)  | O(7)- Eu(1)- O(1)                            | 84.71(9)   |
| O(5)- Eu(1)- O(4)                             | 118.51(10) | O(2)- Eu(1)- O(1)                            | 61.38(8)   |
| O(6)- Eu(1)- O(3) <sup>#1</sup>               | 84.67(10)  | O(6)- Eu(1)- N(1)                            | 155.69(10) |
| O(5)- Eu(1)-O(3) <sup>#1</sup>                | 76.82(10)  | O(5)- Eu(1)- N(1)                            | 83.75(10)  |
| O(4)- Eu(1)-O(3) <sup>#1</sup>                | 155.27(10) | O(4)- Eu(1)- N(1)                            | 121.67(10) |
| O(6)- Eu(1)-O(7)                              | 121.14(10) | O(3) <sup>#1</sup> - Eu(1)- N(1)             | 77.01(10)  |
| O(5)- Eu(1)-O(7)                              | 73.43(10)  | O(7)- Eu(1)- N(1)                            | 64.86(10)  |

---

|                                 |            |                   |            |
|---------------------------------|------------|-------------------|------------|
| O(4)- Eu(1)-O(7)                | 71.34(10)  | O(2)- Eu(1)- N(1) | 115.98(10) |
| O(3) <sup>#1</sup> - Eu(1)-O(7) | 133.37(10) | O(1)- Eu(1)- N(1) | 60.97(9)   |
| O(6)- Eu(1)-O(2)                | 78.58(10)  | O(5)- Eu(1)-O(2)  | 151.71(9)  |
| O(3) <sup>#1</sup> - Eu(1)-O(2) | 87.69(10)  | O(4)- Eu(1)-O(2)  | 69.91(9)   |
| O(7)- Eu(1)-O(2)                | 132.21(9)  | O(6)- Eu(1)-O(1)  | 139.29(9)  |
| O(5)- Eu(1)-O(1)                | 144.06(9)  | O(4)- Eu(1)-O(1)  | 78.94(9)   |

---

**Symmetry transformations used to generate equivalent atoms:** For **1** and **2**: #1  $x$ ,  $1/2-y$ ,  $-1/2+z$ . For **3** and **4**: #1  $x$ ,  $3/2-y$ ,  $-1/2+z$ . For **5**: #1  $-x$ ,  $y$ ,  $1/2-z$ ; #2  $x$ ,  $1+y$ ,  $z$ ; #3  $1-x$ ,  $y$ ,  $1/2-z$ ; #4  $1-x$ ,  $1+y$ ,  $1/2-z$ . For **6** and **7**: #1  $-x$ ,  $1/2+y$ ,  $1/2-z$ .
